# Supplementary material for: A ten-year global monthly averaged terrestrial NEE inferred from the ACOS GOSAT v9 XCO 2 retrievals (GCAS2021)
Source: Copernicus journal article supplement (doi:10.5194/essd-2022-15), 2022-02-04
Supplement: Supplementary file 1 [file essd-2022-15-supplement.pdf]

## Supplementary Information for

### **A ten-year global monthly averaged terrestrial NEE inferred from the ACOS GOSAT v9 XCO<sub>2</sub> retrievals**

Fei Jiang<sup>1,2,4</sup>, Weimin Ju<sup>1,2</sup>, Wei He<sup>1</sup>, Mousong Wu<sup>1</sup>, Hengmao Wang<sup>1</sup>, Jun Wang<sup>1</sup>, Mengwei Jia<sup>1</sup>, Shuzhuang Feng<sup>1</sup>, Lingyu Zhang<sup>1</sup>, Jing M. Chen<sup>1,3</sup>

<sup>1</sup>Jiangsu Provincial Key Laboratory of Geographic Information Science and Technology, International Institute for Earth System Science, Nanjing University, Nanjing, 210023, China

<sup>2</sup>Jiangsu Center for Collaborative Innovation in Geographical Information Resource Development and Application, Nanjing, 210023, China

<sup>3</sup>Department of Geography, University of Toronto, Toronto, Ontario M5S3G3, Canada

<sup>4</sup>Frontiers Science Center for Critical Earth Material Cycling, Nanjing University, Nanjing, 210023, China

*Correspondence to:* Fei Jiang (jiangf@nju.edu.cn)

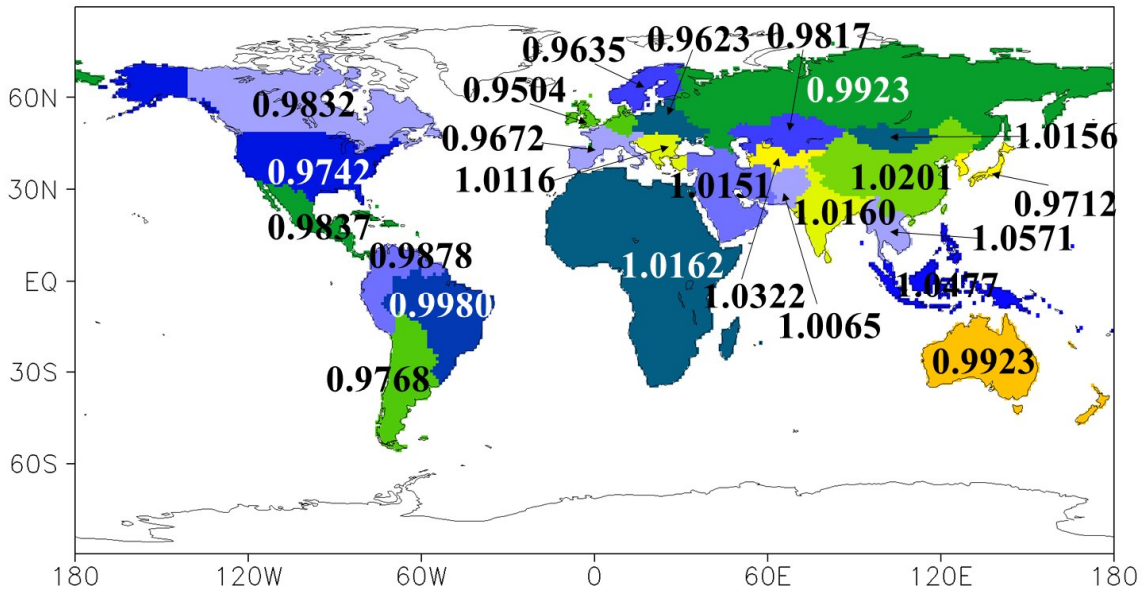

Figure S1: The change rate of fossil fuel and cement carbon emissions in each region in 2019 compared with 2018

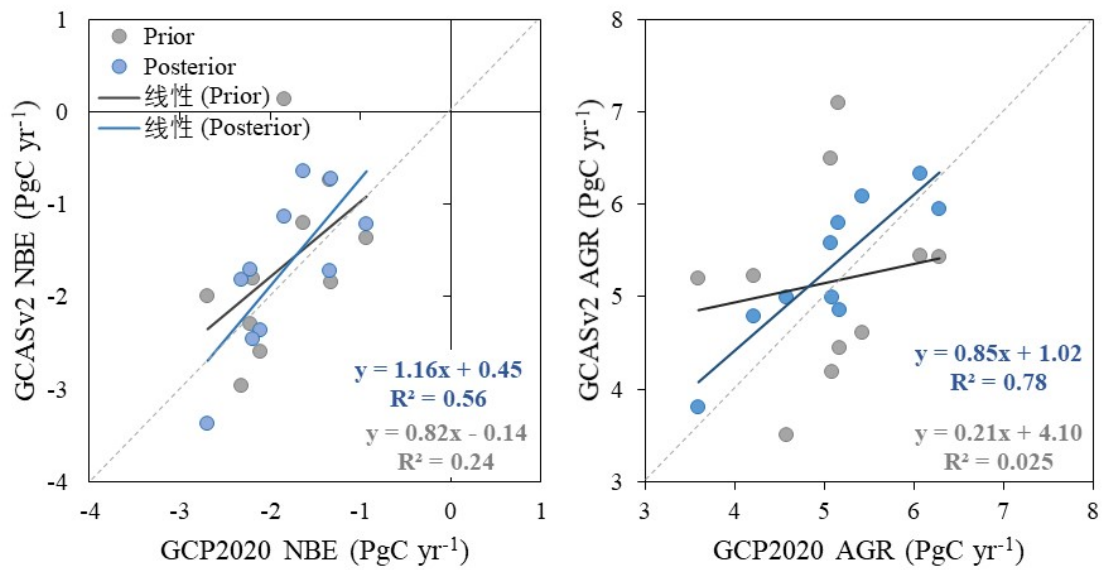

Figure S2: Comparisons between this study and GCP2020 for the estimates of (a) NBE and (b) AGR

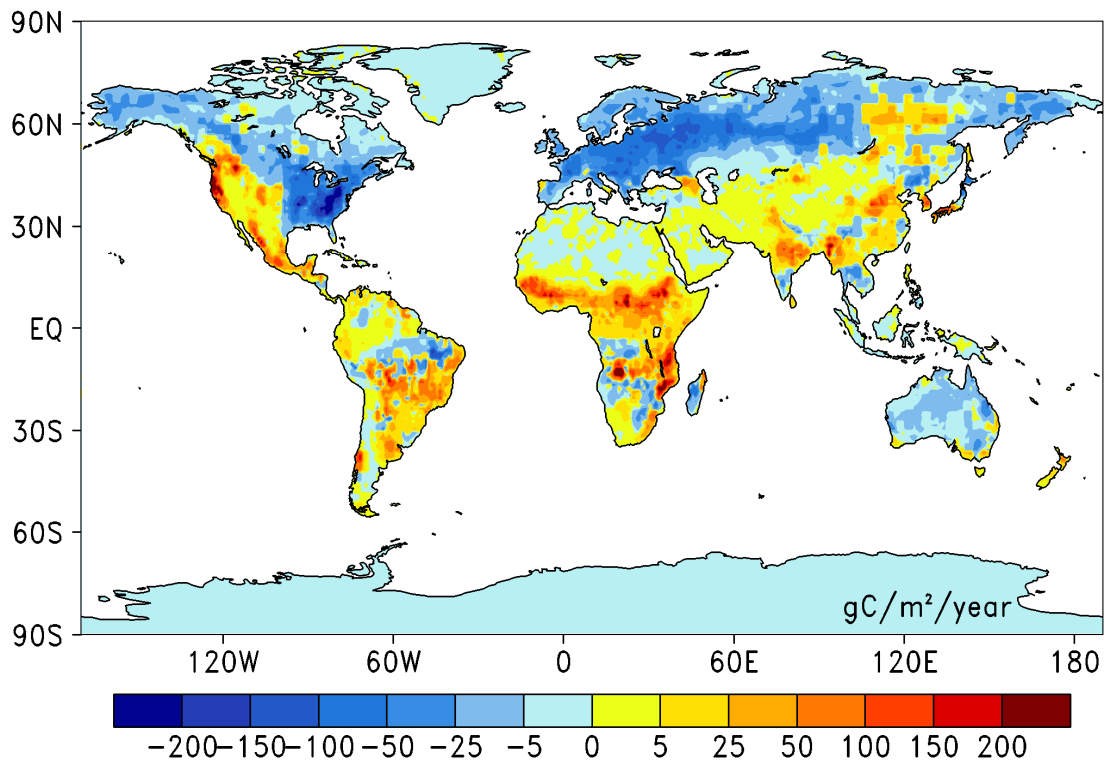

Figure S3: Global distributions of the mean differences between the prior and posterior NEE averaged from 2010 to 2019

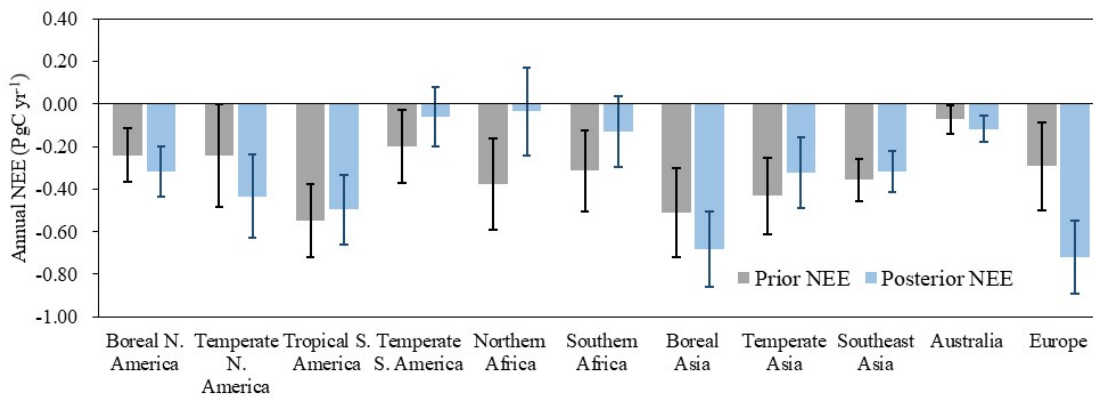

Figure S4: Differences between the prior and posterior NEE in each TRANSCOM 3 regions

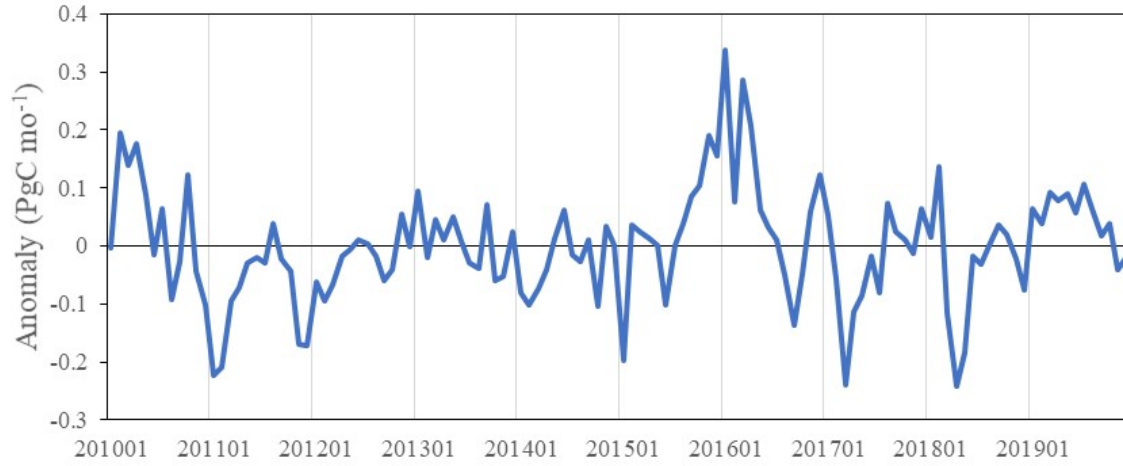

**Figure S5: Anomaly of monthly NEE in the pantropical area (30°S ~ 30°N)**

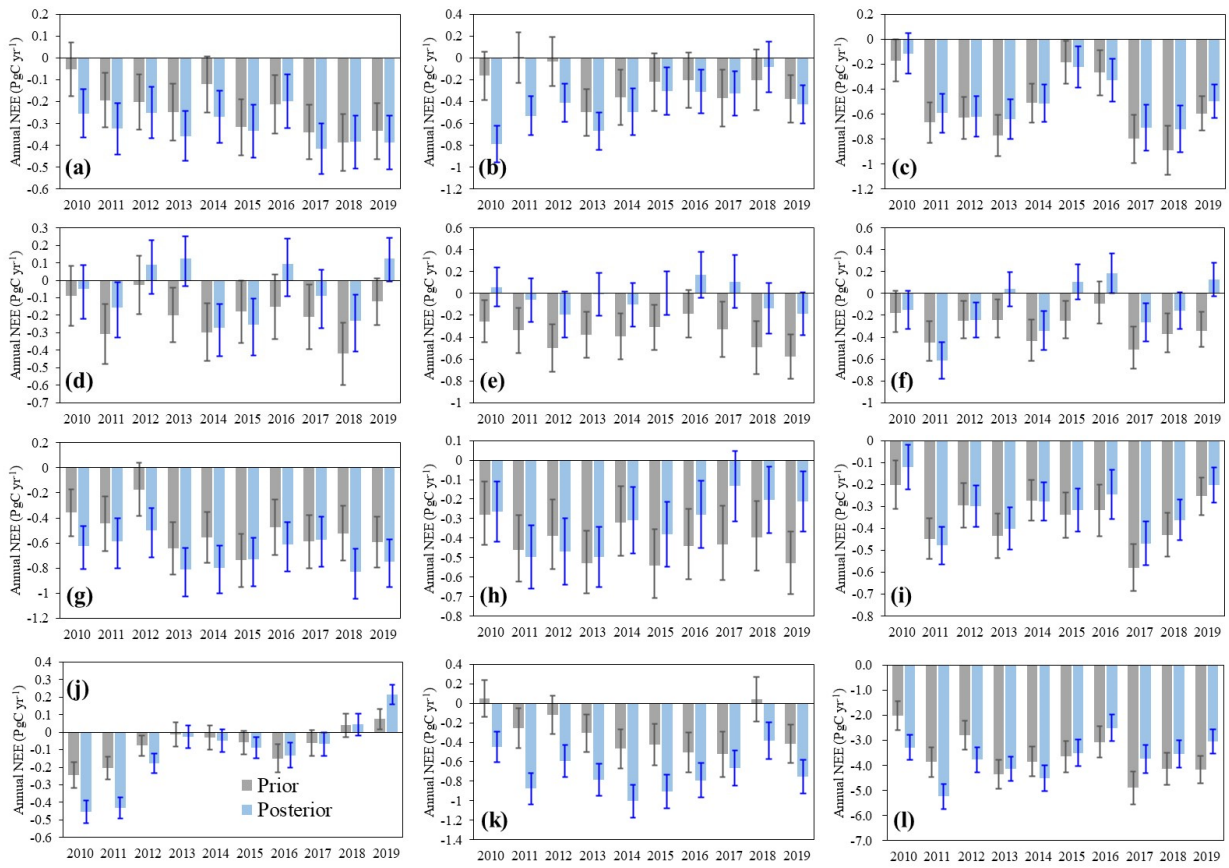

**Figure S6: Interannual variations of the prior and posterior NEE in each TRANSCOM 3 region and in the global scale. (a, Boreal North America; b, Temperate North America; c, Tropical South America; d, Temperate South America; e, Northern Africa; f, Southern Africa; g, Boreal Asia; h, Temperate Asia; i, Southeast Asia; j, Australia; k, Europe; l, Globe)**

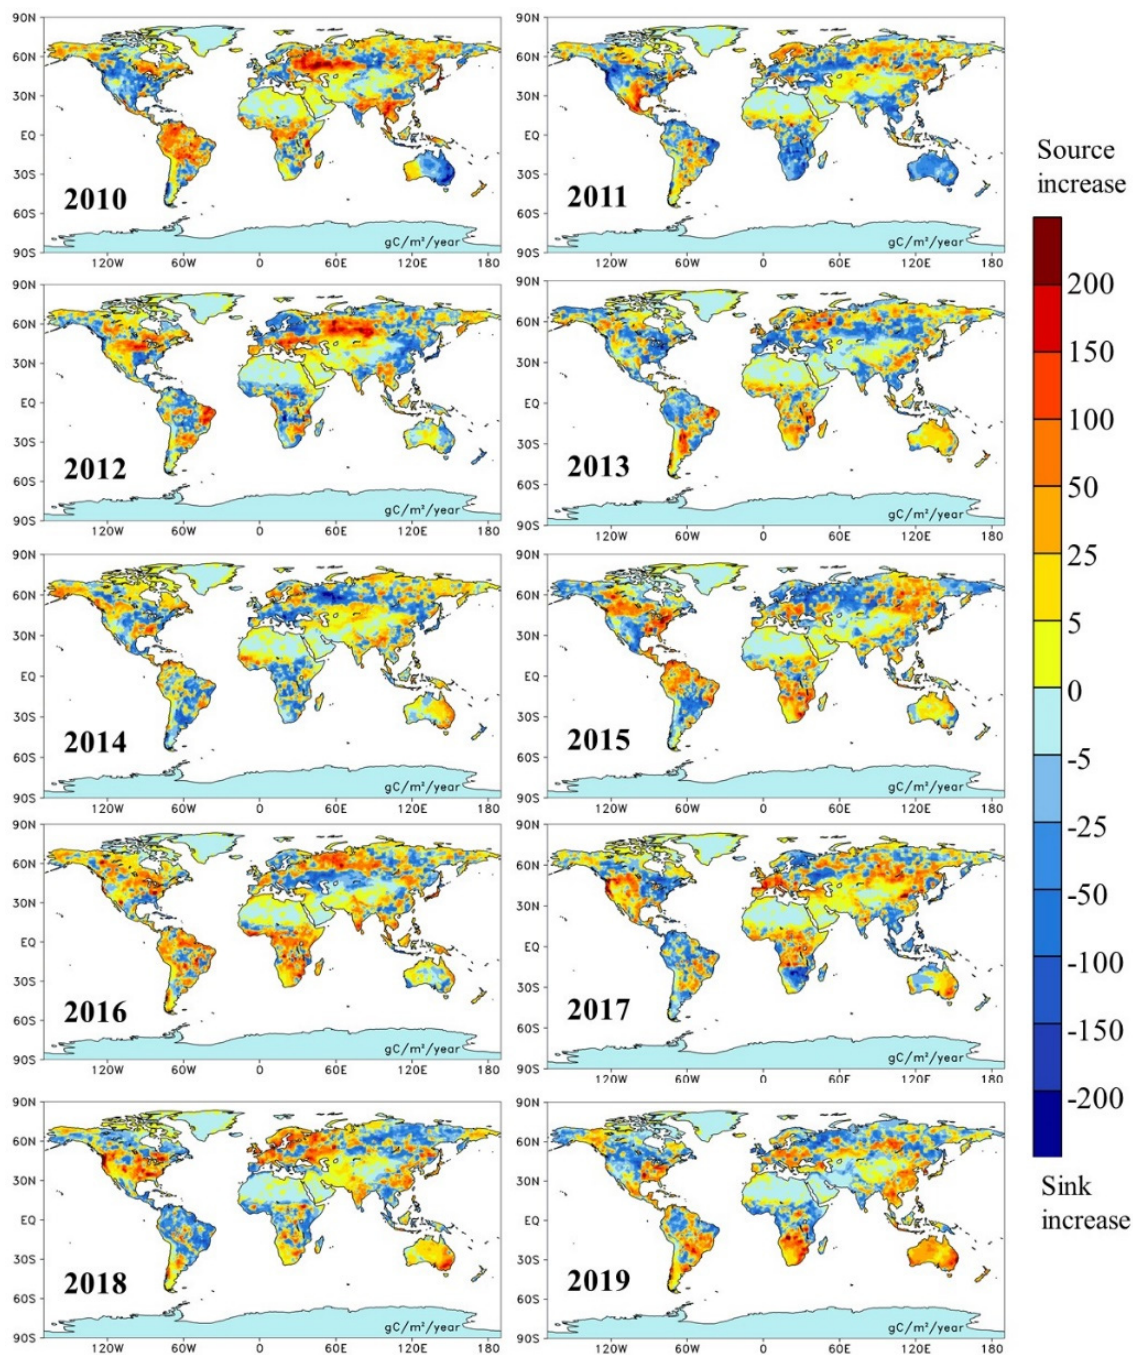

Figure S7: The spatial patterns of NEE anomaly in each year ( $\text{gC m}^{-2} \text{yr}^{-1}$ )

**Table S1: Information of the selected surface flask observations and the evaluation results**

| Locations      | Site | Lab id | Lat    | Lon    | BIAS  | MAE  | RMSE | CORR | No. of data |
|----------------|------|--------|--------|--------|-------|------|------|------|-------------|
| High latitudes | alt  | 1      | 82.45  | 297.49 | 0.7   | 1.54 | 2.07 | 0.98 | 518         |
|                | brw  | 1      | 71.32  | 203.39 | 0.29  | 2    | 2.61 | 0.97 | 555         |
|                | crv  | 1      | 64.99  | 212.4  | 0.47  | 2.79 | 3.52 | 0.93 | 1260        |
|                | ice  | 1      | 63.4   | 339.71 | 0.56  | 1.63 | 2.01 | 0.96 | 161         |
|                | pal  | 1      | 67.97  | 24.12  | -0.04 | 2.53 | 3.34 | 0.96 | 438         |
|                | sum  | 1      | 72.6   | 321.58 | 0.35  | 1.27 | 1.54 | 0.99 | 506         |
|                | tik  | 1      | 71.6   | 128.89 | 0.96  | 3.11 | 4.03 | 0.94 | 303         |
|                | zep  | 1      | 78.91  | 11.89  | 0.88  | 1.83 | 2.44 | 0.97 | 500         |
| North America  | amt  | 1      | 45.03  | 291.32 | 1.97  | 3.26 | 4.07 | 0.95 | 1356        |
|                | bao  | 1      | 40.05  | 255    | -0.8  | 2.49 | 3.28 | 0.86 | 1754        |
|                | bmw  | 1      | 32.26  | 295.12 | 1.69  | 1.99 | 2.58 | 0.97 | 397         |
|                | hsu  | 1      | 41.03  | 235.65 | -0.24 | 2.67 | 3.46 | 0.9  | 69          |
|                | inx  | 1      | 39.8   | 273.98 | 0.51  | 3.79 | 4.66 | 0.93 | 409         |
|                | key  | 1      | 25.67  | 279.84 | 0.49  | 1.65 | 2.38 | 0.96 | 413         |
|                | lef  | 1      | 45.95  | 269.73 | 0.69  | 3    | 3.8  | 0.95 | 1611        |
|                | mbo  | 1      | 43.98  | 238.31 | 0.15  | 1.59 | 2.11 | 0.96 | 1500        |
|                | mex  | 1      | 18.98  | 262.69 | 0.97  | 1.27 | 1.66 | 0.98 | 387         |
|                | mwo  | 1      | 34.22  | 241.94 | -0.81 | 2.24 | 3.11 | 0.92 | 3185        |
|                | nwr  | 1      | 40.05  | 254.41 | 0.06  | 1.6  | 2.15 | 0.96 | 489         |
|                | sct  | 1      | 33.41  | 278.17 | 0.47  | 3.22 | 4.05 | 0.93 | 1689        |
|                | sgp  | 1      | 36.61  | 262.51 | 0.72  | 3.28 | 3.99 | 0.93 | 437         |
|                | str  | 1      | 37.76  | 237.55 | 0.05  | 2.35 | 3.09 | 0.94 | 4842        |
|                | thd  | 1      | 41.05  | 235.85 | -1.05 | 2.35 | 3.13 | 0.91 | 330         |
|                | uta  | 1      | 39.9   | 246.28 | 1.5   | 2.54 | 3.23 | 0.94 | 462         |
| wbi            | 1    | 41.72  | 268.65 | 1.33   | 3.43  | 4.32 | 0.94 | 1645 |             |
| wgc            | 1    | 38.26  | 238.51 | -0.09  | 3.34  | 4.14 | 0.9  | 1238 |             |
| wkt            | 1    | 31.31  | 262.67 | 0.58   | 2.47  | 3.2  | 0.93 | 1326 |             |
| Europe         | bgu  | 11     | 41.97  | 3.23   | -0.3  | 2.74 | 3.45 | 0.92 | 223         |
|                | cib  | 1      | 41.81  | 355.07 | 0.35  | 2.99 | 3.72 | 0.92 | 406         |
|                | flk  | 11     | 35.34  | 25.67  | 0.49  | 2.41 | 2.97 | 0.94 | 207         |
|                | hpb  | 1      | 47.8   | 11.02  | 2.61  | 4.3  | 5.04 | 0.92 | 394         |
|                | hun  | 1      | 46.95  | 16.65  | 0.65  | 3.62 | 4.42 | 0.94 | 426         |
|                | lmp  | 1      | 35.52  | 12.62  | 0.58  | 1.91 | 2.4  | 0.96 | 415         |
|                | mhd  | 1      | 53.33  | 350.1  | 0.2   | 1.52 | 2.15 | 0.97 | 474         |
|                | oxk  | 1      | 50.03  | 11.81  | -0.13 | 3.3  | 4.07 | 0.91 | 360         |
|                | pdm  | 11     | 42.94  | 0.14   | -0.44 | 1.82 | 2.35 | 0.95 | 170         |
| East Asia      | dsi  | 1      | 20.7   | 116.73 | 0.87  | 2.29 | 2.92 | 0.94 | 376         |
|                | lln  | 1      | 23.47  | 120.87 | 1.06  | 2.33 | 3.15 | 0.95 | 384         |
|                | tap  | 1      | 36.74  | 126.13 | 1.52  | 3.5  | 4.41 | 0.92 | 411         |

|               |     |     |        |        |       |      |      |      |     |
|---------------|-----|-----|--------|--------|-------|------|------|------|-----|
|               | uum | 1   | 44.45  | 111.1  | -0.41 | 2.79 | 3.57 | 0.93 | 453 |
|               | wlg | 1   | 36.29  | 100.9  | -0.45 | 1.89 | 2.62 | 0.95 | 477 |
| South America | nat | 1   | -5.8   | 324.81 | 0.11  | 1.09 | 1.52 | 0.97 | 331 |
|               | rpb | 1   | 13.16  | 300.57 | 0.36  | 0.72 | 0.95 | 0.99 | 511 |
|               | ush | 1   | -54.85 | 291.69 | 0.24  | 0.64 | 0.88 | 0.99 | 206 |
| Africa        | ask | 1   | 23.26  | 5.63   | 0.01  | 0.65 | 0.83 | 1    | 474 |
|               | cpt | 1   | -34.35 | 18.49  | 0.53  | 0.66 | 0.9  | 0.99 | 241 |
|               | nmb | 1   | -23.58 | 15.03  | -0.11 | 0.78 | 1.09 | 0.99 | 403 |
|               | sey | 1   | -4.68  | 55.53  | 0.57  | 0.81 | 1.2  | 0.99 | 416 |
|               | wis | 1   | 29.96  | 35.06  | 0.17  | 1.98 | 2.57 | 0.95 | 479 |
| Australia     | bhd | 1   | -41.41 | 174.87 | -0.01 | 0.71 | 1.13 | 0.99 | 144 |
|               | cfa | 2   | -19.28 | 147.06 | -0.03 | 0.92 | 1.27 | 0.99 | 176 |
|               | cgo | 1   | -40.68 | 144.69 | 0.02  | 0.46 | 0.82 | 0.99 | 337 |
|               | gpa | 2   | -12.25 | 131.04 | 1.29  | 2.23 | 2.71 | 0.92 | 64  |
|               | asc | 1   | -7.97  | 345.6  | 0.57  | 0.73 | 0.91 | 1    | 836 |
|               | azr | 1   | 38.77  | 332.62 | 0.29  | 1.57 | 2.02 | 0.96 | 218 |
|               | cba | 1   | 55.21  | 197.28 | -0.91 | 2.08 | 2.82 | 0.96 | 808 |
|               | chr | 1   | 1.7    | 202.85 | 0.59  | 0.85 | 1.07 | 0.99 | 249 |
|               | crz | 1   | -46.43 | 51.85  | 0.1   | 0.32 | 0.41 | 1    | 396 |
|               | cya | 2   | -66.28 | 110.52 | 0.24  | 0.31 | 0.39 | 1    | 222 |
|               | eic | 1   | -27.16 | 250.57 | 0.16  | 0.91 | 1.39 | 0.98 | 342 |
|               | gmi | 1   | 13.39  | 144.66 | 0.41  | 1.07 | 1.58 | 0.98 | 525 |
|               | hba | 1   | -75.61 | 333.79 | 0.34  | 0.4  | 0.47 | 1    | 323 |
|               | izo | 1   | 28.31  | 343.5  | 0.59  | 1.06 | 1.44 | 0.99 | 483 |
|               | kum | 1   | 19.56  | 205.11 | -0.18 | 1.25 | 1.79 | 0.98 | 718 |
|               | maa | 2   | -67.62 | 62.87  | 0.36  | 0.38 | 0.46 | 1    | 239 |
|               | mid | 1   | 28.21  | 182.62 | 0.54  | 1.34 | 1.73 | 0.98 | 465 |
|               | mlo | 1   | 19.54  | 204.42 | 0.22  | 0.61 | 0.8  | 1    | 637 |
|               | mqa | 2   | -54.48 | 158.97 | 0.17  | 0.4  | 0.55 | 1    | 242 |
|               | psa | 1   | -64.92 | 296    | 0.21  | 0.38 | 0.47 | 1    | 466 |
|               | rkl | 426 | -29.2  | 182.1  | -0.07 | 0.58 | 0.7  | 1    | 49  |
|               | shm | 1   | 52.71  | 174.13 | -0.2  | 2.07 | 2.76 | 0.96 | 429 |
|               | smo | 1   | -14.25 | 189.44 | 0.37  | 0.57 | 0.76 | 1    | 798 |
|               | spo | 1   | -89.98 | 335.2  | 0.3   | 0.35 | 0.41 | 1    | 494 |
|               | syo | 1   | -69.01 | 39.59  | 0.28  | 0.34 | 0.4  | 1    | 237 |
|               | All |     |        |        | 0.35  | 1.76 | 2.28 | 0.96 | -   |
